# Supplementary material
Source: Springer Nature journal article supplement (https://www.springermedizin.de/resource/supplementary/13049_2011_284_MOESM4_ESM.pdf/9666260)

Difference of EVLWI (CT) and EVLWI (TPTD)

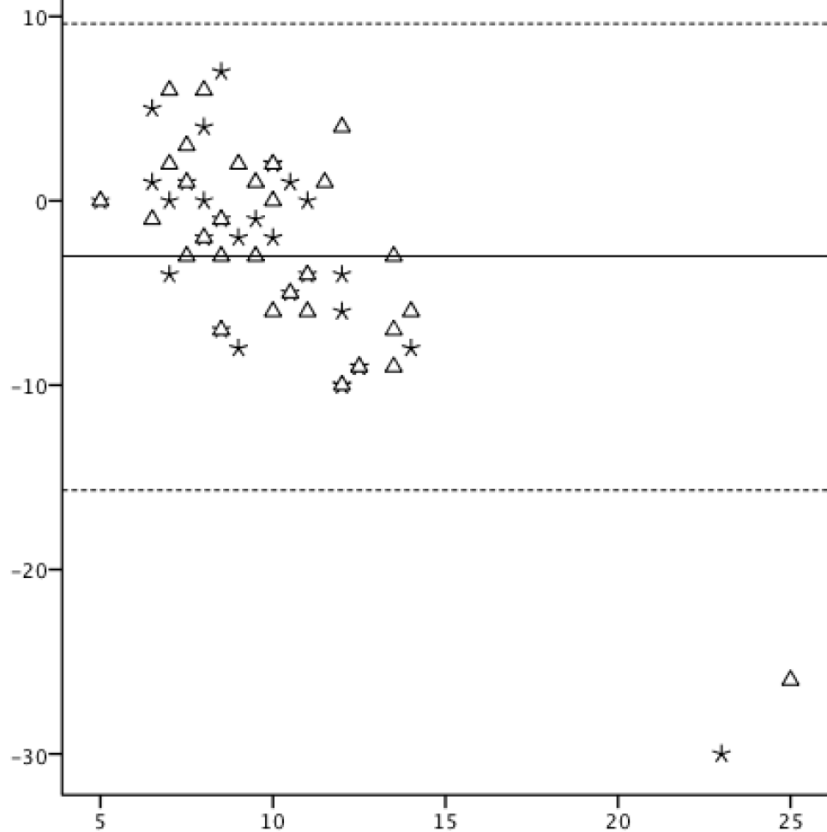

Average of EVLWI (CT) and EVLWI (TPTD)

Supplement: MOESM4 [file 9666260]
